# Supplementary material for: A counterexample to Dhillon (1998)
Source: Springer Nature journal article supplement (doi:10.1007/s00355-017-1037-9), 2017-03-14
Supplement: 355_2017_1037_MOESM1_ESM.pdf [file 355_2017_1037_MOESM1_ESM.pdf]

# Calculations For “A Note on Dhillon (1998)”

Tilman Börgers\* and Yan-Min Choo†  
Department of Economics  
University of Michigan, Ann Arbor

August 2015

## Equation (4)

Equation (3) is equivalent to:

$$\hat{\lambda}_1 + \hat{\lambda}_4 = c + d \quad (1)$$

$$\hat{\lambda}_2 + \hat{\lambda}_4 = 2c + d \quad (2)$$

$$\hat{\lambda}_3 = d \quad (3)$$

Subtracting the first equation from the second, we obtain:

$$\hat{\lambda}_2 - \hat{\lambda}_1 = c \quad (4)$$

Thus, we need  $\hat{\lambda}_2 - \hat{\lambda}_1 > 0$  to ensure that  $c > 0$ . Substituting from (4) for  $c$ , and from (3) for  $d$  into the first equation, we obtain:

$$\hat{\lambda}_1 + \hat{\lambda}_4 = \hat{\lambda}_2 - \hat{\lambda}_1 + \hat{\lambda}_3 \Leftrightarrow \quad (5)$$

$$\hat{\lambda}_2 + \hat{\lambda}_3 = 2\hat{\lambda}_1 + \hat{\lambda}_4 \quad (6)$$

Thus, any solution to (3) in the main text must satisfy (4) in the main text. On the other hand, given any solution that satisfies (4) in the main text, we can use (4) and (3) above to determine  $c$  and  $d$  such that (3) in the main text holds.

## Equation (7)

The first three conditions of equation (6) are:

$$\hat{\lambda}_1 + \lambda_4 = 7c + d \quad (7)$$

$$\hat{\lambda}_2 + \lambda_4 = 10c + d \quad (8)$$

$$\hat{\lambda}_3 + \lambda_4 = 6c + d \quad (9)$$

---

\*tborgers@umich.edu

†ychoo@umich.edu

Subtracting (7) from (8) we obtain:

$$\hat{\lambda}_2 - \hat{\lambda}_1 = 3c \quad (10)$$

Subtracting (9) from (7), we get:

$$\hat{\lambda}_1 - \hat{\lambda}_3 = c \quad (11)$$

Using (11) to substitute for  $c$  in (10), we get:

$$\hat{\lambda}_2 - \hat{\lambda}_1 = 3(\hat{\lambda}_1 - \hat{\lambda}_3) \Leftrightarrow \quad (12)$$

$$4\hat{\lambda}_1 - \hat{\lambda}_2 - 3\hat{\lambda}_3 = 0 \quad (13)$$

### Equation (10)

We can write out (9) as:

$$\hat{\lambda}_1 + \lambda_3 + \hat{\lambda}_4 = 12c + d \quad (14)$$

$$\hat{\lambda}_2 + \lambda_3 + \hat{\lambda}_4 = 15c + d \quad (15)$$

$$\lambda_3 = 5c + d \quad (16)$$

$$0 = d \quad (17)$$

Using (17) to drop  $d$  from (14)-(16), and then using (16) to replace  $\lambda_3$  in (14) and (15), we get:

$$\hat{\lambda}_1 + 5c + \hat{\lambda}_4 = 12c \quad (18)$$

$$\hat{\lambda}_2 + 5c + \hat{\lambda}_4 = 15c \quad (19)$$

which is equivalent to:

$$\hat{\lambda}_1 + \hat{\lambda}_4 = 7c \quad (20)$$

$$\hat{\lambda}_2 + \hat{\lambda}_4 = 10c \quad (21)$$

We solve (21) for  $c$ , and substitute into (20) to get:

$$\hat{\lambda}_1 + \hat{\lambda}_4 = \frac{7}{10}(\hat{\lambda}_2 + \hat{\lambda}_4) \Leftrightarrow \quad (22)$$

$$10\hat{\lambda}_1 + 10\hat{\lambda}_4 = 7\hat{\lambda}_2 + 7\hat{\lambda}_4 \Leftrightarrow \quad (23)$$

$$10\hat{\lambda}_1 - 7\hat{\lambda}_2 + 3\hat{\lambda}_4 = 0 \quad (24)$$

### Equation (13)

We can write out (12) as:

$$\hat{\lambda}_1 + \lambda_2 + \hat{\lambda}_4 = 16c + d \quad (25)$$

$$\lambda_2 + \hat{\lambda}_4 = 10c + d \quad (26)$$

$$\lambda_2 + \hat{\lambda}_3 = 14c + d \quad (27)$$

$$\hat{\lambda}_3 = 5c + d \quad (28)$$

We use (28) to replace  $d$  by  $\hat{\lambda}_3 - 5c$  in (25)-(27):

$$\hat{\lambda}_1 + \lambda_2 + \hat{\lambda}_4 = 11c + \hat{\lambda}_3 \quad (29)$$

$$\lambda_2 + \hat{\lambda}_4 = 5c + \hat{\lambda}_3 \quad (30)$$

$$\lambda_2 + \hat{\lambda}_3 = 9c + \hat{\lambda}_3 \quad (31)$$

Equation (32) tells us that  $\lambda_2$  equals  $9c$  which we substitute into (29) and (30) to get:

$$\hat{\lambda}_1 + 9c + \hat{\lambda}_4 = 11c + \hat{\lambda}_3 \quad (32)$$

$$9c + \hat{\lambda}_4 = 5c + \hat{\lambda}_3 \quad (33)$$

We solve (33) for  $c$ , and substitute into (32) to get:

$$\hat{\lambda}_1 + \hat{\lambda}_4 = 2 \cdot \frac{\hat{\lambda}_3 - \hat{\lambda}_4}{4} + \hat{\lambda}_3 \Leftrightarrow \quad (34)$$

$$2\hat{\lambda}_1 + 2\hat{\lambda}_4 = \hat{\lambda}_3 - \hat{\lambda}_4 + 2\hat{\lambda}_3 \Leftrightarrow \quad (35)$$

$$2\hat{\lambda}_1 - 3\hat{\lambda}_3 + 3\hat{\lambda}_4 = 0 \quad (36)$$

### Equation (14)

Equations (7), (10) and (13) from the text are:

$$4\hat{\lambda}_1 - \hat{\lambda}_2 - 3\hat{\lambda}_3 = 0 \quad (37)$$

$$10\hat{\lambda}_1 - 7\hat{\lambda}_2 + 3\hat{\lambda}_4 = 0 \quad (38)$$

$$2\hat{\lambda}_1 - 3\hat{\lambda}_3 + 3\hat{\lambda}_4 = 0 \quad (39)$$

We solve (39) for  $3\hat{\lambda}_4$  and substitute into (38), to get:

$$10\hat{\lambda}_1 - 7\hat{\lambda}_2 + 3\hat{\lambda}_3 - 2\hat{\lambda}_1 = 0 \Leftrightarrow \quad (40)$$

$$8\hat{\lambda}_1 - 7\hat{\lambda}_2 + 3\hat{\lambda}_3 = 0 \quad (41)$$

We add (37) and (41) and get:

$$12\hat{\lambda}_1 - 8\hat{\lambda}_2 = 0 \Leftrightarrow \quad (42)$$

$$\frac{\hat{\lambda}_1}{\hat{\lambda}_2} = \frac{2}{3} \quad (43)$$

We solve (43) for  $\hat{\lambda}_1$  and then substitute into (37) to get:

$$\frac{8}{3}\hat{\lambda}_2 - \hat{\lambda}_2 - 3\hat{\lambda}_3 = 0 \Leftrightarrow \quad (44)$$

$$\frac{\hat{\lambda}_2}{\hat{\lambda}_3} = \frac{9}{5} \quad (45)$$

We can combine (43) and (45) to obtain:

$$\hat{\lambda}_1 = \frac{2}{3} \cdot \frac{9}{5} \hat{\lambda}_3 = \frac{6}{5} \hat{\lambda}_3 \quad (46)$$

Plugging (46), and also (45) (solved for  $\hat{\lambda}_2$ ) into (39), we get:

$$\frac{12}{5}\hat{\lambda}_3 - 3\hat{\lambda}_3 + 3\hat{\lambda}_4 = 0 \Leftrightarrow \quad (47)$$

$$\frac{\hat{\lambda}_3}{\hat{\lambda}_4} = \frac{5}{1} \quad (48)$$

### Equation (20)

We can write out (19) as:

$$\lambda_1 = c + d \quad (49)$$

$$\lambda_1 + \lambda_2 = 2c + d \quad (50)$$

$$\lambda_3 = c + d \quad (51)$$

We thus conclude from (49) and (51) that  $\lambda_1 = \lambda_3$ . Subtracting (49) from (50) we obtain:

$$\lambda_2 = c \quad (52)$$

If we choose  $\lambda_1, \lambda_2, \lambda_3$  such that  $\lambda_1 = \lambda_3$ , then we can use (52) to determine  $c$ , and then (49) to determine  $d$ .
